# Supplementary material for: Mblk-1/E93, an ecdysone related-transcription factor, targets synaptic plasticity-related genes in the honey bee mushroom bodies
Source: Sci Rep. 2022 Dec 9;12:21367. doi: 10.1038/s41598-022-23329-z (PMC9734179; doi:10.1038/s41598-022-23329-z)
Supplement: Supplementary file 2 — Supplementary Information 2. [file 41598_2022_23329_MOESM2_ESM.xlsx]

## Sheet: q-value_0.005
Pupal-specific gene candidates identified using a peak calling q-value threshold of 0.005
gene=LOC410769	product=puromycin-sensitive aminopeptidase
gene=Emc	product=extra macrochaetae
gene=LOC113219396	product=leucine-rich repeat serine/threonine-protein kinase 1
gene=LOC408625	product=nuclear pore complex protein Nup85
gene=LOC552676	product=39S ribosomal protein L3 mitochondrial
gene=LOC412511	product=importin subunit alpha-3
gene=LOC100578247	product=sodium channel protein Nach
gene=LOC410732	product=3-phosphoinositide-dependent protein kinase 1
gene=LOC550899	product=UPF0769 protein C21orf59 homolog
gene=LOC410673	product=protein RRNAD1
gene=LOC725239	product=RNA-binding protein 33
gene=LOC410672	product=smad nuclear interacting protein 1
gene=LOC410671	product=proto-oncogene tyrosine-protein kinase ROS
gene=LOC551320	product=schwannomin-interacting protein 1 homolog
gene=LOC725894	product=protein rhomboid
gene=osp	product=protein outspread
gene=LOC100577047	product=uncharacterized protein LOC100577047
gene=LOC726282	product=uncharacterized protein LOC726282
gene=LOC724853	product=probable G-protein coupled receptor Mth-like 1
gene=LOC410941	product=protein MTO1 homolog%2C mitochondrial
gene=LOC113218665	product=plectin-like
gene=LOC409857	product=ribosomal RNA small subunit methyltransferase NEP1
gene=LOC551826	product=homeotic protein female sterile
gene=LOC410079	product=zinc finger protein 385B
gene=LOC107964206	product=zinc finger protein 717
gene=LOC726044	product=unconventional myosin-XVIIIa
gene=LOC726073	product=gamma-tubulin complex component 3
gene=LOC725341	product=beta-13-galactosyltransferase 5
gene=LOC102654580	product=nuclear receptor subfamily 2 group E member 1-like
gene=LOC408805	product=progestin and adipoQ receptor family member 3
gene=Dscam	product=Down syndrome cell adhesion molecule
gene=LOC409115	product=probable dolichol-phosphate mannosyltransferase
gene=LOC100578015	product=centrosomal protein of 104 kDa
gene=LOC411579	product=tRNA (cytosine(34)-C(5))-methyltransferase
gene=LOC412457	product=T-cell activation inhibitor mitochondrial
gene=LOC412456	product=engulfment and cell motility protein 1
gene=LOC409559	product=probable protein S-acyltransferase 23
gene=LOC552621	product=RNA polymerase II-associated factor 1 homolog
gene=LOC726550	product=CCAAT/enhancer-binding protein gamma
gene=LOC411642	product=NF-kappa-B inhibitor-interacting Ras-like protein
gene=LOC726585	product=dihydroceramide fatty acyl 2-hydroxylase FAH2
gene=LOC550918	product=ATP-binding cassette sub-family G member 4
gene=LOC552379	product=TBC1 domain family member 15
gene=LOC113218792	product=uncharacterized protein LOC113218792
gene=LOC102656245	product=centromere protein F
gene=LOC413319	product=dynein regulatory complex subunit 7
gene=LOC408845	product=protein unc-79 homolog
gene=LOC552545	product=division abnormally delayed protein
gene=LOC408890	product=protein groucho
gene=LOC408878	product=protein mesh
gene=LOC551045	product=CCR4-NOT transcription complex subunit 7
gene=LOC411692	product=elongation of very long chain fatty acids protein 4
gene=LOC100578105	product=coiled-coil and C2 domain-containing protein 2A
gene=LOC550827	product=tubulin alpha-1 chain
gene=LOC552305	product=E3 ubiquitin-protein ligase RNF14
gene=LOC552327	product=UDP-N-acetylglucosamine--dolichyl-phosphate N-acetylglucosaminephosphotransferase
gene=LOC100578875	product=beta-14-mannosyl-glycoprotein 4-beta-N-acetylglucosaminyltransferase
gene=LOC413361	product=TBC1 domain family member 16
gene=LOC413362	product=ATP-dependent DNA helicase Q1-like
gene=LOC100576784	product=high mobility group B protein 6
gene=LOC412818	product=glutamate receptor ionotropic NMDA 2B
gene=LOC411194	product=MAU2 chromatid cohesion factor homolog
gene=LOC408909	product=NADH-quinone oxidoreductase subunit B 2
gene=LOC408908	product=anoctamin-8
gene=LOC102654281	product=uncharacterized protein LOC102654281
gene=LOC409631	product=transient-receptor-potential-like protein
gene=LOC725057	product=coatomer subunit beta
gene=LOC100576982	product=uncharacterized protein LOC100576982
gene=LOC409633	product=ras-related and estrogen-regulated growth inhibitor
gene=LOC412827	product=Bardet-Biedl syndrome 2 protein homolog
gene=LOC724750	product=ER membrane protein complex subunit 10
gene=LOC724819	product=mitotic spindle assembly checkpoint protein MAD1
gene=5-HT2beta	product=serotonin receptor
gene=LOC100576193	product=keratinocyte proline-rich protein
gene=LOC413995	product=sensory neuron membrane protein 1
gene=LOC100577758	product=G-protein coupled receptor moody
gene=LOC551496	product=H/ACA ribonucleoprotein complex subunit GAR1
gene=LOC100578448	product=uncharacterized protein LOC100578448
gene=LOC102655420	product=uncharacterized protein LOC102655420
gene=LOC726611	product=uncharacterized protein LOC726611
gene=LOC550655	product=protein FAM49B
gene=LOC410305	product=transcription initiation factor TFIID subunit 12
gene=LOC408345	product=E3 ubiquitin-protein ligase ZNF598
gene=LOC410306	product=ADP-ribosylation factor 2
gene=LOC551736	product=nephrin
gene=LOC410323	product=dynein heavy chain 7 axonemal
gene=LOC409108	product=uncharacterized protein LOC409108
gene=LOC551590	product=upstream stimulatory factor 1
gene=LOC100576373	product=chloride channel CLIC-like protein 1
gene=LOC409611	product=disintegrin and metalloproteinase domain-containing protein 10
gene=LOC100577551	product=eukaryotic translation initiation factor 5B
gene=LOC726825	product=homeobox protein HMX2
gene=Antp	product=homeotic protein antennapedia
gene=LOC113218523	product=uncharacterized LOC113218523
gene=LOC410758	product=mRNA decay activator protein ZFP36L3
gene=LOC408586	product=probable nuclear hormone receptor HR3
gene=LOC724195	product=B-cell receptor CD22
gene=LOC726496	product=protein lin-37 homolog
gene=LOC552278	product=protein-tyrosine sulfotransferase
gene=LOC552653	product=equilibrative nucleoside transporter 3
gene=LOC410987	product=uncharacterized LOC410987
gene=LOC408844	product=dual specificity protein phosphatase 10
gene=LOC552505	product=monocarboxylate transporter 9
gene=LOC413616	product=tyrosine-protein kinase transmembrane receptor Ror
gene=LOC411238	product=LIM domain-binding protein 2
gene=LOC100576405	product=AT-rich interactive domain-containing protein 5B
gene=NLG-3	product=neuroligin 3
gene=LOC724138	product=igLON family member 5
gene=LOC410167	product=sorbitol dehydrogenase
gene=LOC409257	product=uncharacterized LOC409257
gene=LOC102653663	product=uncharacterized LOC102653663
gene=Ubx	product=ultrabithorax
gene=LOC410649	product=tyrosine-protein kinase Btk29A
gene=LOC113219278	product=uncharacterized LOC113219278
gene=LOC102654759	product=uncharacterized LOC102654759
gene=LOC100578104	product=uncharacterized LOC100578104
gene=LOC100578131	product=uncharacterized LOC100578131
gene=LOC102655531	product=uncharacterized LOC102655531
gene=LOC113218766	product=uncharacterized LOC113218766
gene=LOC113218826	product=uncharacterized LOC113218826
gene=LOC102654016	product=uncharacterized LOC102654016
gene=LOC102653977	product=uncharacterized LOC102653977
gene=LOC102654115	product=uncharacterized LOC102654115
gene=LOC102654896	product=uncharacterized LOC102654896
gene=LOC113218955	product=uncharacterized LOC113218955
gene=LOC107964872	product=uncharacterized LOC107964872
gene=LOC102655071	product=uncharacterized LOC102655071
gene=LOC102655339	product=uncharacterized LOC102655339
gene=LOC102655465	product=uncharacterized LOC102655465
gene=LOC107965212	product=uncharacterized LOC107965212
gene=LOC113219134	product=uncharacterized LOC113219134
gene=LOC102656016	product=uncharacterized LOC102656016
gene=LOC102655539	product=uncharacterized LOC102655539
gene=LOC102655582	product=uncharacterized LOC102655582
gene=LOC726886	product=uncharacterized LOC726886
gene=LOC113218581	product=uncharacterized LOC113218581
gene=LOC102656601	product=uncharacterized LOC102656601
gene=LOC408872	product=COUP transcription factor 2

## Sheet: q-value_0.01
Pupal-specific gene candidates identified using a peak calling q-value threshold of 0.01
gene=LOC411194
gene=LOC552621
gene=LOC100576982
gene=LOC412960
gene=H
gene=LOC113218955
gene=LOC100578247
gene=nAChRa3
gene=LOC408586
gene=LOC412448
gene=LOC726073
gene=LOC408343
gene=LOC410941
gene=LOC113218792
gene=LOC410305
gene=LOC410306
gene=LOC408748
gene=LOC107964872
gene=LOC408625
gene=LOC409559
gene=LOC724853
gene=LOC408345
gene=LOC725308
gene=LOC408909
gene=LOC408908
gene=LOC102654115
gene=Emc
gene=LOC100578515
gene=LOC102653803
gene=LOC100578875
gene=LOC412696
gene=LOC410671
gene=LOC410673
gene=LOC410672
gene=LOC408872
gene=LOC410952
gene=LOC412456
gene=LOC411642
gene=LOC412457
gene=LOC410953
gene=LOC113219134
gene=LOC408878
gene=LOC102654580
gene=LOC724744
gene=LOC102656245
gene=LOC107965212
gene=LOC550827
gene=LOC100577019
gene=LOC102655539
gene=LOC552327
gene=LOC100578105
gene=LOC100578104
gene=LOC410167
gene=LOC410323
gene=LOC107964805
gene=TRNAN-GUU
gene=LOC412748
gene=LOC551590
gene=LOC409572
gene=LOC413318
gene=NLG-3
gene=LOC409857
gene=LOC724795
gene=LOC726336
gene=LOC550818
gene=LOC550899
gene=LOC408805
gene=LOC550655
gene=LOC550930
gene=LOC102653628
gene=LOC102654959
gene=LOC552676
gene=LOC552278
gene=LOC413684
gene=LOC727390
gene=LOC410694
gene=LOC412511
gene=LOC408890
gene=LOC725251
gene=Ubx
gene=LOC726585
gene=LOC113218581
gene=LOC113219396
gene=Antp
gene=LOC725894
gene=LOC102654281
gene=LOC409108
gene=LOC724720
gene=LOC725414
gene=LOC102655531
gene=LOC724608
gene=LOC551736
gene=LOC102653977
gene=LOC552305
gene=LOC100577758
gene=LOC552545
gene=LOC100576784
gene=LOC113219326
gene=LOC409631
gene=LOC100577112
gene=LOC409079
gene=LOC726550
gene=LOC410987
gene=LOC725341
gene=LOC413616
gene=LOC726397
gene=LOC726310
gene=LOC725344
gene=LOC107964158
gene=osp
gene=LOC724654
gene=LOC724138
gene=LOC550918
gene=LOC724535
gene=LOC409633
gene=LOC409115
gene=LOC102654159
gene=LOC724819
gene=LOC552379
gene=LOC552653
gene=LOC551321
gene=LOC113218523
gene=LOC410079
gene=LOC113218765
gene=LOC551320
gene=LOC551045
gene=LOC100576373
gene=LOC726282
gene=LOC726044
gene=LOC725238
gene=LOC725239
gene=LOC102656601
gene=TRNAL-UAA
gene=LOC411692
gene=LOC413592
gene=LOC413995
gene=LOC409257
gene=LOC411579
gene=LOC410487
gene=EF1a-F2
gene=LOC724195
gene=LOC107964206
gene=LOC410769
gene=LOC726496
gene=LOC412818
gene=LOC724750
gene=LOC102656671
gene=LOC102655582
gene=Dscam
gene=LOC102654896
gene=LOC102654016
gene=LOC551826
gene=LOC113218826
gene=LOC102654759
gene=LOC413361
gene=LOC413362
gene=LOC113218944
gene=LOC113218665
gene=LOC100578015
gene=LOC100577046
gene=LOC100577047
gene=LOC100576193
gene=LOC725450
gene=LOC408295
gene=LOC408294
gene=LOC100578131
gene=LOC725057
gene=LOC412827
gene=5-HT2beta
gene=LOC102654089
gene=LOC552505
